# Supplementary material for: Loss of CYLD accelerates melanoma development and progression in the Tg(Grm1) melanoma mouse model
Source: Springer Nature journal article supplement (doi:10.1038/s41389-019-0169-4), 2019-10-07
Supplement: 41389_2019_169_MOESM1_ESM.pdf [file 41389_2019_169_MOESM1_ESM.pdf]

## Supplementary Figure 1

A

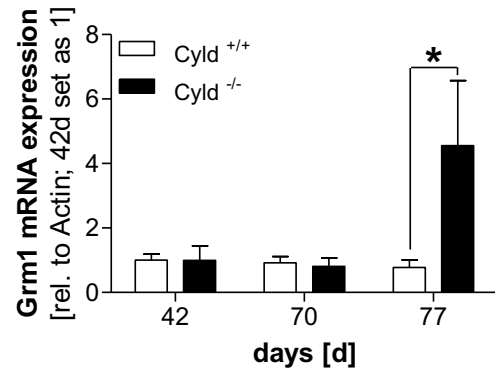

**Supplementary Fig.S1: Development of lymph node metastasis in Tg(*Grm1*)**

*Cyld* wt and deficient mice

Grm1 mRNA expression level of lymph node tissues from *Cyld*-wildtype and *Cyld*-knockout mice analyzed at three age of day 42, 70 and 77 of the mice (42d set1). (\*:  $p < 0.05$ )

## Supplementary Figure 2

A

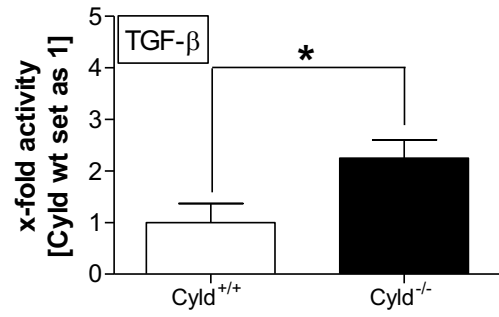

### Supplementary Fig.S2: Analysis of TGF-beta signaling

Luciferase reporter gene assay using (CAGA)<sub>9</sub>LUC vector revealed a significant enhanced TGF-β activity of the *Cyld*-knockout compared to *Cyld*-wildtype cell line. (\*: p < 0.05)
